# Supplementary material for: Understanding radiation response and cell cycle variation in brain tumour cells using Raman spectroscopy
Source: Royal Society of Chemistry journal article supplement (doi:10.1039/d3an00121k), 2023-01-01

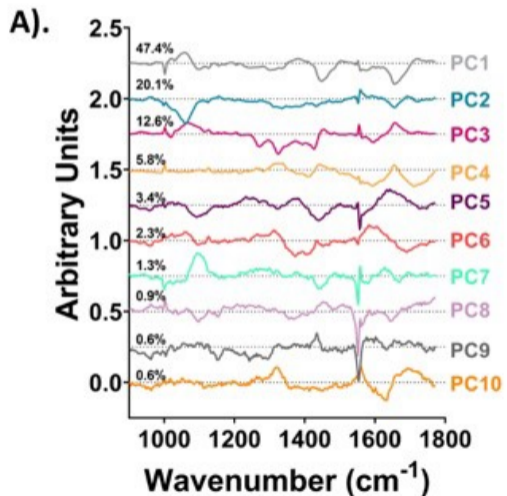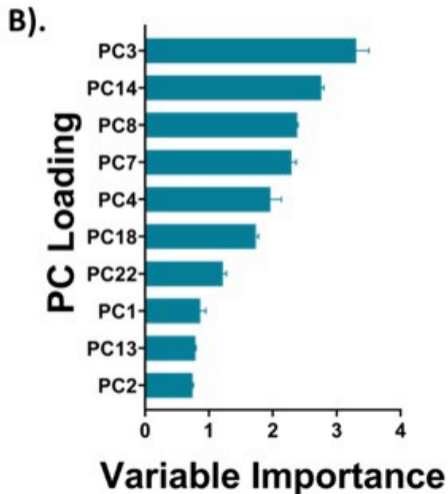

Supplement: d3an00121k4.pdf [file d3an00121k4.pdf]
