# Supplementary material for: Understanding radiation response and cell cycle variation in brain tumour cells using Raman spectroscopy
Source: Royal Society of Chemistry journal article supplement (doi:10.1039/d3an00121k), 2023-01-01

1 hour

A).

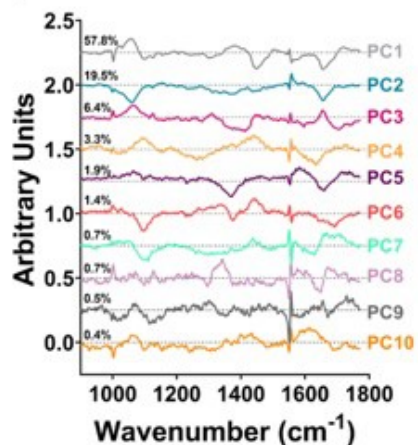

B).

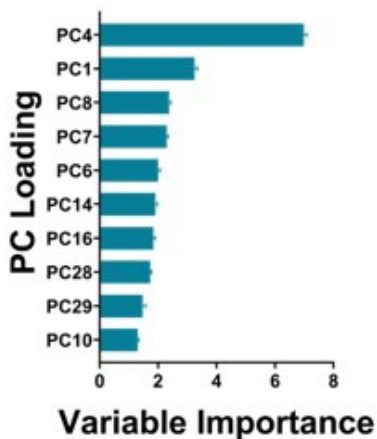

4 hour

A).

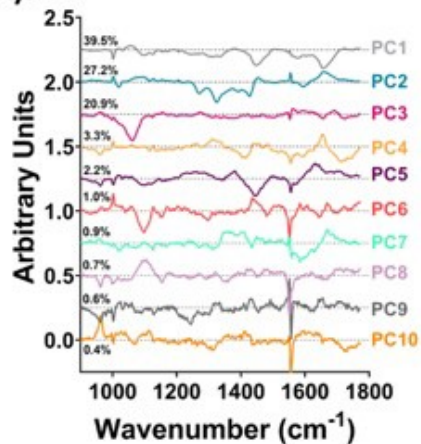

B).

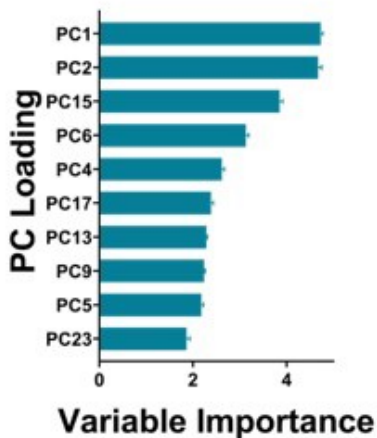

24 hour

A).

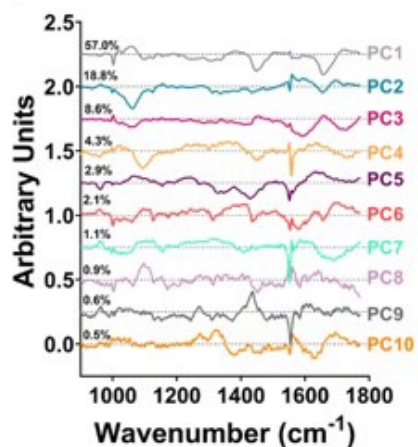

B).

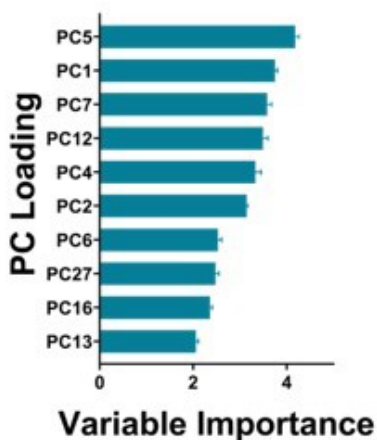

Supplement: d3an00121k7.pdf [file d3an00121k7.pdf]
